# Supplementary material
Source: HighWire-hosted journal article supplement (https://bmjopen.bmj.com/content/12/9/e061719)
Supplement: inline-supplementary-material-2 [file inline-supplementary-material-2.pdf]

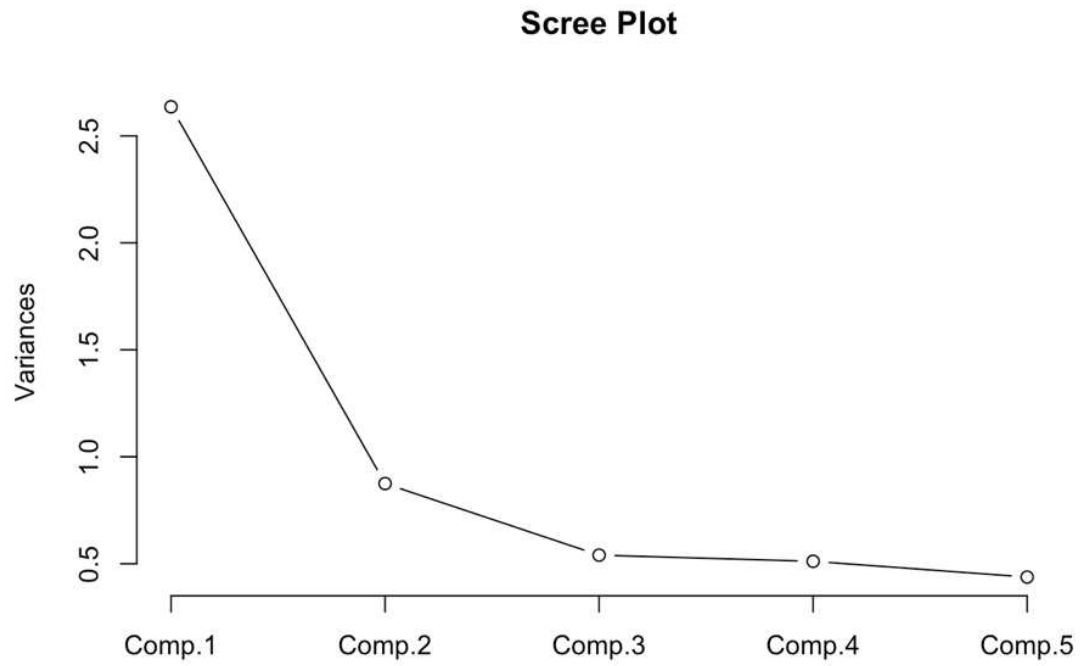

**Supplementary Figure 1:** Scree Plot for Factor Analysis with PSS-10 Scale

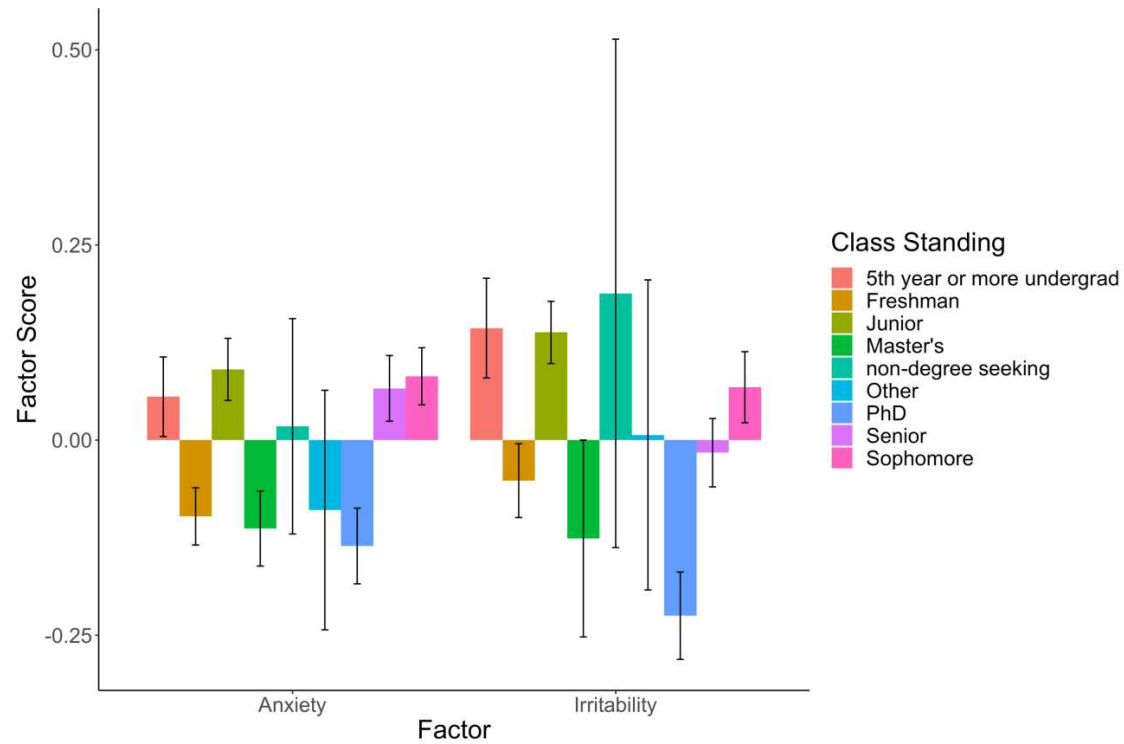

The colored bars represent the mean factor scores and the error bars are presented with all colored bars.

**Supplementary Figure 2:** Mean Factor Scores for UNLV Students (n = 1,699) by Class Standing.

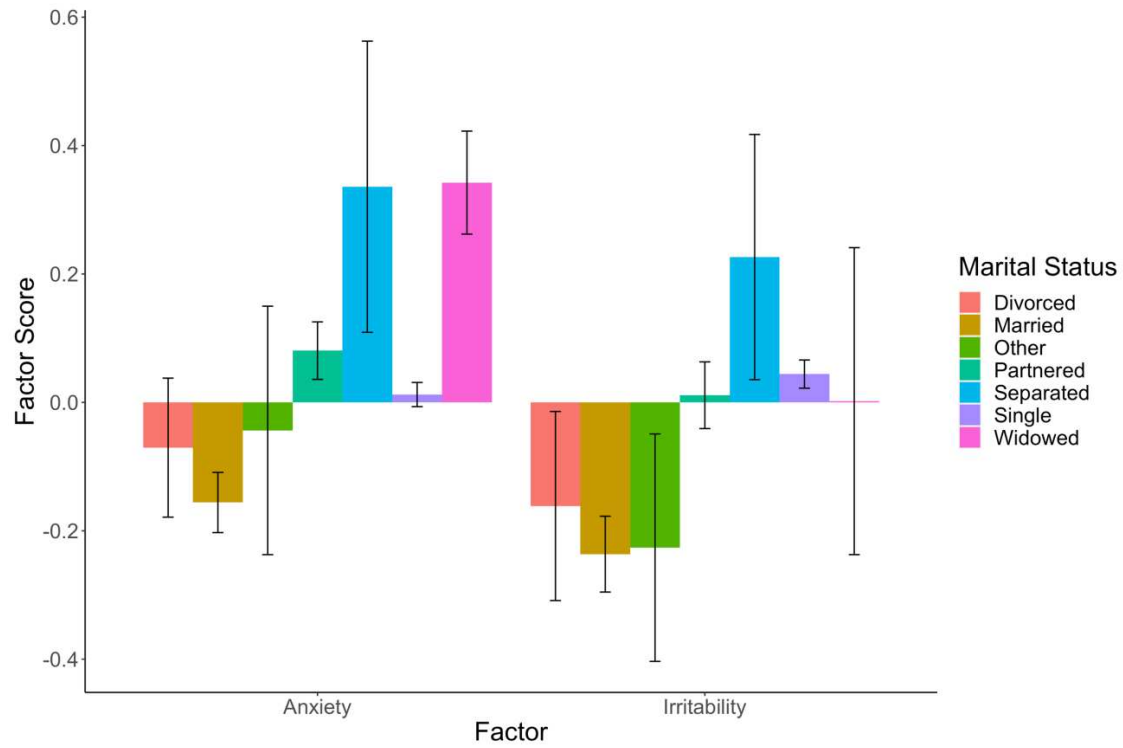

The colored bars represent the mean factor scores and the error bars are presented with all colored bars.

**Supplementary Figure 3:** Mean Factor Scores for UNLV Students (n = 1,699) by Marital Status
